# Supplementary material for: Patient-Specific Human Induced Pluripotent Stem Cell Model Assessed with Electrical Pacing Validates S107 as a Potential Therapeutic Agent for Catecholaminergic Polymorphic Ventricular Tachycardia
Source: PLoS One. 2016 Oct 20;11(10):e0164795. doi: 10.1371/journal.pone.0164795 (PMC5072719; doi:10.1371/journal.pone.0164795)
Supplement: S1 Table — (XLSX) [file pone.0164795.s001.xlsx]

## Sheet: Sheet1
S1 Table
Primers used for sequencing of the human RYR2 gene (exon 94) and qRT-PCR
Gene	Use	Primer forward	Primer reverse
RYR2-exon 94	sequencing	tgtcttttgcttgcaatggt	caggtaccttggtgccttact
CALR	qRT-PCR	cccgatcccagtatctatgc	ctcctcagcgtatgcctca
ITPR2 (IP3R2)	qRT-PCR	aggagcctactccaaaactgc	gtctgacattgatatccccatct
ATP2A2 (SERCA2)	qRT-PCR	ggtgatattgtagaaattgctgttg	tgactggtcaactcttagtgtggt
RYR2	qRT-PCR	ctgcgccattcctatagtgg	agttgaagaccgggaggtg
CASQ2	qRT-PCR	gagtttgatggcgagtttgc	ttgctgctgatgatctccac
GAPDH	qRT-PCR	gctctctgctcctcctgttc	acgaccaaatccgttgactc
